# Supplementary material
Source: publisher figshare collection journal article supplement (https://acs.figshare.com/ndownloader/files/6994607)
Supplement: Supplementary file 1 [file 6994607]

 
data_1 
 
_audit_creation_method            SHELXL-97 
_chemical_name_systematic 
; 
 ? 
; 
_chemical_name_common             ? 
_chemical_melting_point           ? 
_chemical_formula_moiety          
 '2(C24 H20 As), Co N4 O12'
_chemical_formula_sum 
 'C48 H40 As2 Co N4 O12' 
_chemical_formula_weight          1073.61 
 
loop_ 
 _atom_type_symbol 
 _atom_type_description 
 _atom_type_scat_dispersion_real 
 _atom_type_scat_dispersion_imag 
 _atom_type_scat_source 
 'C'  'C'   0.0033   0.0016 
 'International Tables Vol C Tables 4.2.6.8 and 6.1.1.4' 
 'H'  'H'   0.0000   0.0000 
 'International Tables Vol C Tables 4.2.6.8 and 6.1.1.4' 
 'N'  'N'   0.0061   0.0033 
 'International Tables Vol C Tables 4.2.6.8 and 6.1.1.4' 
 'O'  'O'   0.0106   0.0060 
 'International Tables Vol C Tables 4.2.6.8 and 6.1.1.4' 
 'Co'  'Co'   0.3494   0.9721 
 'International Tables Vol C Tables 4.2.6.8 and 6.1.1.4' 
 'As'  'As'   0.0499   2.0058 
 'International Tables Vol C Tables 4.2.6.8 and 6.1.1.4' 
 
_symmetry_cell_setting           'Monoclinic'
_symmetry_space_group_name_H-M   'C2/c  '
_symmetry_space_group_name_Hall   '-C 2yc  '
 
loop_ 
 _symmetry_equiv_pos_as_xyz 
 'x, y, z' 
 '-x, y, -z+1/2' 
 'x+1/2, y+1/2, z' 
 '-x+1/2, y+1/2, -z+1/2' 
 '-x, -y, -z' 
 'x, -y, z-1/2' 
 '-x+1/2, -y+1/2, -z' 
 'x+1/2, -y+1/2, z-1/2' 
 
_cell_length_a                    23.327(3) 
_cell_length_b                    11.2821(15) 
_cell_length_c                    18.512(3) 
_cell_angle_alpha                 90.00 
_cell_angle_beta                  107.022(2) 
_cell_angle_gamma                 90.00 
_cell_volume                      4658.5(11) 
_cell_formula_units_Z             4 
_cell_measurement_temperature     296(2) 
_cell_measurement_reflns_used    5462
_cell_measurement_theta_min        2.19
_cell_measurement_theta_max       27.14
 
_exptl_crystal_description        block
_exptl_crystal_colour             ? 
_exptl_crystal_size_max           0.31 
_exptl_crystal_size_mid           0.28 
_exptl_crystal_size_min           0.23 
_exptl_crystal_density_meas       ? 
_exptl_crystal_density_diffrn     1.531 
_exptl_crystal_density_method     'not measured' 
_exptl_crystal_F_000              2180 
_exptl_absorpt_coefficient_mu     1.846 
_exptl_absorpt_correction_type    multi-scan
_exptl_absorpt_correction_T_min   0.5985 
_exptl_absorpt_correction_T_max   0.6762 
_exptl_absorpt_process_details    'SADABS (Bruker, 2011)'
 
_exptl_special_details 
; 
 ? 
; 
 
_diffrn_ambient_temperature       296(2) 
_diffrn_radiation_wavelength      0.71073 
_diffrn_radiation_type            MoK\a 
_diffrn_radiation_source          'fine-focus sealed tube' 
_diffrn_radiation_monochromator   graphite 
_diffrn_measurement_device_type   'APEX2 CCD detector'
_diffrn_measurement_method        ? 
_diffrn_detector_area_resol_mean  ? 
_diffrn_reflns_number             16435 
_diffrn_reflns_av_R_equivalents   0.0240 
_diffrn_reflns_av_sigmaI/netI     0.0293 
_diffrn_reflns_limit_h_min        -30 
_diffrn_reflns_limit_h_max        23 
_diffrn_reflns_limit_k_min        -14 
_diffrn_reflns_limit_k_max        15 
_diffrn_reflns_limit_l_min        -24 
_diffrn_reflns_limit_l_max        24 
_diffrn_reflns_theta_min          1.83 
_diffrn_reflns_theta_max          28.26 
_reflns_number_total              5736 
_reflns_number_gt                 4437 
_reflns_threshold_expression      >2sigma(I) 
 
_computing_data_collection        ? 
_computing_cell_refinement        ? 
_computing_data_reduction         ? 
_computing_structure_solution     'SHELXS-97 (Sheldrick, 2008)' 
_computing_structure_refinement   'SHELXL-97 (Sheldrick, 2008)' 
_computing_molecular_graphics     ? 
_computing_publication_material   ? 
 
_refine_special_details 
; 
 Refinement of F^2^ against ALL reflections.  The weighted R-factor wR and 
 goodness of fit S are based on F^2^, conventional R-factors R are based 
 on F, with F set to zero for negative F^2^. The threshold expression of 
 F^2^ > 2sigma(F^2^) is used only for calculating R-factors(gt) etc. and is 
 not relevant to the choice of reflections for refinement.  R-factors based 
 on F^2^ are statistically about twice as large as those based on F, and R- 
 factors based on ALL data will be even larger. 
; 
 
_refine_ls_structure_factor_coef  Fsqd  
_refine_ls_matrix_type            full 
_refine_ls_weighting_scheme       calc  
_refine_ls_weighting_details 
 'calc w=1/[\s^2^(Fo^2^)+(0.0369P)^2^+1.4054P] where P=(Fo^2^+2Fc^2^)/3' 
_atom_sites_solution_primary      direct 
_atom_sites_solution_secondary    difmap 
_atom_sites_solution_hydrogens    geom 
_refine_ls_hydrogen_treatment     constr
_refine_ls_extinction_method      none 
_refine_ls_extinction_coef        ? 
_refine_ls_number_reflns          5736 
_refine_ls_number_parameters      340 
_refine_ls_number_restraints      134 
_refine_ls_R_factor_all           0.0448 
_refine_ls_R_factor_gt            0.0303 
_refine_ls_wR_factor_ref          0.0770 
_refine_ls_wR_factor_gt           0.0716 
_refine_ls_goodness_of_fit_ref    1.024 
_refine_ls_restrained_S_all       1.029 
_refine_ls_shift/su_max           0.004 
_refine_ls_shift/su_mean          0.000 
 
loop_ 
 _atom_site_label 
 _atom_site_type_symbol 
 _atom_site_fract_x 
 _atom_site_fract_y 
 _atom_site_fract_z 
 _atom_site_U_iso_or_equiv 
 _atom_site_adp_type 
 _atom_site_occupancy 
 _atom_site_symmetry_multiplicity 
 _atom_site_calc_flag 
 _atom_site_refinement_flags 
 _atom_site_disorder_assembly 
 _atom_site_disorder_group 
As1 As 0.340094(8) 0.306418(15) 0.150751(11) 0.04143(7) Uani 1 1 d . . . 
C1 C 0.28668(8) 0.17988(16) 0.15429(11) 0.0449(4) Uani 1 1 d . . . 
C2 C 0.24787(10) 0.19202(19) 0.19807(13) 0.0567(5) Uani 1 1 d . . . 
H2 H 0.2484 0.2604 0.2263 0.068 Uiso 1 1 calc R . . 
C3 C 0.20835(10) 0.1011(2) 0.19927(14) 0.0680(6) Uani 1 1 d . . . 
H3 H 0.1817 0.1084 0.2279 0.082 Uiso 1 1 calc R . . 
C4 C 0.20856(11) 0.0006(2) 0.15828(16) 0.0744(7) Uani 1 1 d . . . 
H4 H 0.1823 -0.0607 0.1597 0.089 Uiso 1 1 calc R . . 
C5 C 0.24681(11) -0.0112(2) 0.11519(16) 0.0723(7) Uani 1 1 d . . . 
H5 H 0.2458 -0.0798 0.0870 0.087 Uiso 1 1 calc R . . 
C6 C 0.28703(10) 0.07806(17) 0.11322(13) 0.0566(5) Uani 1 1 d . . . 
H6 H 0.3137 0.0696 0.0848 0.068 Uiso 1 1 calc R . . 
C7 C 0.29312(8) 0.44496(16) 0.11406(11) 0.0440(4) Uani 1 1 d . . . 
C8 C 0.23138(9) 0.43955(18) 0.09445(13) 0.0558(5) Uani 1 1 d . . . 
H8 H 0.2124 0.3675 0.0959 0.067 Uiso 1 1 calc R . . 
C9 C 0.19793(10) 0.5409(2) 0.07265(14) 0.0649(6) Uani 1 1 d . . . 
H9 H 0.1563 0.5368 0.0591 0.078 Uiso 1 1 calc R . . 
C10 C 0.22512(11) 0.6472(2) 0.07068(14) 0.0662(6) Uani 1 1 d . . . 
H10 H 0.2023 0.7156 0.0569 0.079 Uiso 1 1 calc R . . 
C11 C 0.28702(12) 0.6521(2) 0.08937(17) 0.0774(8) Uani 1 1 d . . . 
H11 H 0.3059 0.7244 0.0880 0.093 Uiso 1 1 calc R . . 
C12 C 0.32085(10) 0.55143(19) 0.10994(15) 0.0660(6) Uani 1 1 d . . . 
H12 H 0.3624 0.5551 0.1211 0.079 Uiso 1 1 calc R . . 
C13 C 0.38590(8) 0.26035(17) 0.08518(11) 0.0455(4) Uani 1 1 d . . . 
C14 C 0.37529(10) 0.30986(19) 0.01443(12) 0.0564(5) Uani 1 1 d . . . 
H14 H 0.3484 0.3723 -0.0003 0.068 Uiso 1 1 calc R . . 
C15 C 0.40523(11) 0.2657(3) -0.03474(14) 0.0683(6) Uani 1 1 d . . . 
H15 H 0.3988 0.2990 -0.0824 0.082 Uiso 1 1 calc R . . 
C16 C 0.44407(11) 0.1730(2) -0.01244(17) 0.0731(7) Uani 1 1 d . . . 
H16 H 0.4636 0.1427 -0.0456 0.088 Uiso 1 1 calc R . . 
C17 C 0.45476(11) 0.1242(2) 0.05746(17) 0.0734(7) Uani 1 1 d . . . 
H17 H 0.4815 0.0613 0.0716 0.088 Uiso 1 1 calc R . . 
C18 C 0.42605(10) 0.16776(19) 0.10790(15) 0.0619(6) Uani 1 1 d . . . 
H18 H 0.4337 0.1354 0.1560 0.074 Uiso 1 1 calc R . . 
C19 C 0.39024(8) 0.33412(16) 0.25149(11) 0.0448(4) Uani 1 1 d . . . 
C20 C 0.38880(9) 0.25403(19) 0.30790(12) 0.0534(5) Uani 1 1 d . . . 
H20 H 0.3668 0.1843 0.2961 0.064 Uiso 1 1 calc R . . 
C21 C 0.42043(10) 0.2792(2) 0.38164(14) 0.0668(6) Uani 1 1 d . . . 
H21 H 0.4192 0.2268 0.4199 0.080 Uiso 1 1 calc R . . 
C22 C 0.45373(10) 0.3809(2) 0.39898(14) 0.0695(6) Uani 1 1 d . . . 
H22 H 0.4746 0.3976 0.4490 0.083 Uiso 1 1 calc R . . 
C23 C 0.45640(11) 0.4578(2) 0.34341(15) 0.0719(7) Uani 1 1 d . . . 
H23 H 0.4798 0.5257 0.3555 0.086 Uiso 1 1 calc R . . 
C24 C 0.42453(10) 0.4355(2) 0.26909(14) 0.0621(6) Uani 1 1 d . . . 
H24 H 0.4262 0.4885 0.2313 0.074 Uiso 1 1 calc R . . 
Co2 Co 0.0000 0.33346(4) 0.2500 0.07544(15) Uani 1 2 d S . . 
N1 N 0.10068(12) 0.3990(2) 0.22091(13) 0.0832(6) Uani 1 1 d . . . 
O1 O 0.05783(10) 0.45953(19) 0.22935(15) 0.1091(7) Uani 1 1 d . A . 
O2 O 0.09520(12) 0.2909(2) 0.22597(15) 0.1135(8) Uani 1 1 d . A . 
O3 O 0.14234(10) 0.4446(2) 0.20584(15) 0.1170(8) Uani 1 1 d . A . 
N2 N -0.0591(10) 0.2657(15) 0.1140(10) 0.084(4) Uani 0.30(2) 1 d PDU A 1 
O4 O -0.0432(7) 0.1906(13) 0.1647(9) 0.073(3) Uani 0.30(2) 1 d PDU A 1 
O5 O -0.0417(10) 0.3663(11) 0.1318(12) 0.100(4) Uani 0.30(2) 1 d PDU A 1 
O6 O -0.0887(10) 0.239(3) 0.0512(9) 0.116(5) Uani 0.30(2) 1 d PDU A 1 
N2' N -0.0609(4) 0.2525(7) 0.1070(4) 0.0748(17) Uani 0.70(2) 1 d PDU A 2 
O4' O -0.0307(5) 0.2072(8) 0.1685(4) 0.104(2) Uani 0.70(2) 1 d PDU A 2 
O5' O -0.0689(6) 0.3583(6) 0.1052(6) 0.130(2) Uani 0.70(2) 1 d PDU A 2 
O6' O -0.0802(5) 0.1871(9) 0.0536(5) 0.112(2) Uani 0.70(2) 1 d PDU A 2 
 
loop_ 
 _atom_site_aniso_label 
 _atom_site_aniso_U_11 
 _atom_site_aniso_U_22 
 _atom_site_aniso_U_33 
 _atom_site_aniso_U_23 
 _atom_site_aniso_U_13 
 _atom_site_aniso_U_12 
As1 0.04364(11) 0.03854(11) 0.04526(12) 0.00109(8) 0.01795(8) -0.00226(8) 
C1 0.0463(10) 0.0424(10) 0.0469(11) 0.0036(8) 0.0149(8) -0.0057(8) 
C2 0.0581(12) 0.0599(13) 0.0576(13) 0.0000(10) 0.0254(10) -0.0073(10) 
C3 0.0621(14) 0.0768(16) 0.0714(16) 0.0119(13) 0.0295(12) -0.0138(12) 
C4 0.0667(15) 0.0641(15) 0.0897(19) 0.0190(13) 0.0187(13) -0.0219(12) 
C5 0.0826(17) 0.0443(12) 0.0884(19) -0.0047(11) 0.0225(14) -0.0124(11) 
C6 0.0646(13) 0.0445(11) 0.0649(14) -0.0024(10) 0.0255(11) -0.0042(9) 
C7 0.0477(10) 0.0419(10) 0.0454(10) 0.0027(8) 0.0180(8) 0.0003(8) 
C8 0.0493(12) 0.0483(11) 0.0707(14) 0.0025(10) 0.0188(10) -0.0037(9) 
C9 0.0502(12) 0.0639(14) 0.0809(17) 0.0059(12) 0.0195(11) 0.0092(10) 
C10 0.0713(15) 0.0501(12) 0.0777(17) 0.0100(11) 0.0226(12) 0.0116(11) 
C11 0.0749(17) 0.0441(12) 0.107(2) 0.0153(13) 0.0165(15) -0.0041(11) 
C12 0.0499(12) 0.0525(12) 0.0920(18) 0.0162(12) 0.0151(11) -0.0037(10) 
C13 0.0436(10) 0.0448(10) 0.0531(11) -0.0008(8) 0.0219(8) -0.0033(8) 
C14 0.0500(11) 0.0679(14) 0.0530(12) 0.0040(10) 0.0180(9) 0.0018(10) 
C15 0.0618(14) 0.0965(18) 0.0525(14) -0.0058(12) 0.0260(11) -0.0086(13) 
C16 0.0669(15) 0.0776(17) 0.089(2) -0.0246(14) 0.0458(14) -0.0103(13) 
C17 0.0711(15) 0.0528(13) 0.113(2) 0.0011(13) 0.0525(15) 0.0089(11) 
C18 0.0650(14) 0.0532(12) 0.0768(16) 0.0122(11) 0.0350(12) 0.0074(10) 
C19 0.0413(10) 0.0465(10) 0.0478(11) -0.0013(8) 0.0150(8) 0.0010(8) 
C20 0.0520(11) 0.0503(11) 0.0551(13) 0.0053(9) 0.0110(9) 0.0014(9) 
C21 0.0609(14) 0.0752(16) 0.0580(14) 0.0141(12) 0.0077(11) 0.0046(12) 
C22 0.0576(13) 0.0827(17) 0.0570(14) -0.0061(12) -0.0006(11) 0.0021(12) 
C23 0.0616(14) 0.0681(15) 0.0775(18) -0.0085(13) 0.0072(12) -0.0164(11) 
C24 0.0610(13) 0.0589(13) 0.0632(14) 0.0048(11) 0.0135(11) -0.0132(10) 
Co2 0.1015(4) 0.0529(3) 0.0887(4) 0.000 0.0540(3) 0.000 
N1 0.0942(17) 0.0891(17) 0.0807(16) -0.0097(13) 0.0480(13) -0.0129(14) 
O1 0.1120(16) 0.0940(15) 0.148(2) 0.0105(14) 0.0794(16) 0.0072(13) 
O2 0.142(2) 0.0866(16) 0.135(2) -0.0012(14) 0.0776(17) 0.0013(14) 
O3 0.1016(15) 0.135(2) 0.137(2) -0.0216(15) 0.0711(15) -0.0352(14) 
N2 0.086(8) 0.108(8) 0.067(7) -0.008(7) 0.037(6) -0.017(7) 
O4 0.068(5) 0.075(5) 0.081(6) 0.023(5) 0.029(4) -0.010(4) 
O5 0.118(8) 0.084(6) 0.115(8) -0.002(5) 0.061(6) -0.029(5) 
O6 0.091(7) 0.189(15) 0.063(6) -0.006(9) 0.013(5) -0.023(11) 
N2' 0.072(3) 0.098(4) 0.064(3) -0.002(3) 0.035(3) -0.014(3) 
O4' 0.110(5) 0.103(4) 0.089(3) -0.026(3) 0.015(3) 0.029(3) 
O5' 0.160(6) 0.074(3) 0.142(5) 0.029(3) 0.022(5) -0.005(3) 
O6' 0.136(5) 0.134(5) 0.077(3) -0.020(3) 0.048(3) -0.030(4) 
 
_geom_special_details 
; 
 All esds (except the esd in the dihedral angle between two l.s. planes) 
 are estimated using the full covariance matrix.  The cell esds are taken 
 into account individually in the estimation of esds in distances, angles 
 and torsion angles; correlations between esds in cell parameters are only 
 used when they are defined by crystal symmetry.  An approximate (isotropic) 
 treatment of cell esds is used for estimating esds involving l.s. planes. 
; 
 
loop_ 
 _geom_bond_atom_site_label_1 
 _geom_bond_atom_site_label_2 
 _geom_bond_distance 
 _geom_bond_site_symmetry_2 
 _geom_bond_publ_flag 
As1 C1 1.9086(17) . ? 
As1 C13 1.9091(18) . ? 
As1 C19 1.915(2) . ? 
As1 C7 1.9155(18) . ? 
C1 C6 1.379(3) . ? 
C1 C2 1.387(3) . ? 
C2 C3 1.384(3) . ? 
C2 H2 0.9300 . ? 
C3 C4 1.365(4) . ? 
C3 H3 0.9300 . ? 
C4 C5 1.366(4) . ? 
C4 H4 0.9300 . ? 
C5 C6 1.384(3) . ? 
C5 H5 0.9300 . ? 
C6 H6 0.9300 . ? 
C7 C12 1.377(3) . ? 
C7 C8 1.380(3) . ? 
C8 C9 1.377(3) . ? 
C8 H8 0.9300 . ? 
C9 C10 1.361(3) . ? 
C9 H9 0.9300 . ? 
C10 C11 1.384(3) . ? 
C10 H10 0.9300 . ? 
C11 C12 1.372(3) . ? 
C11 H11 0.9300 . ? 
C12 H12 0.9300 . ? 
C13 C14 1.378(3) . ? 
C13 C18 1.384(3) . ? 
C14 C15 1.392(3) . ? 
C14 H14 0.9300 . ? 
C15 C16 1.366(4) . ? 
C15 H15 0.9300 . ? 
C16 C17 1.360(4) . ? 
C16 H16 0.9300 . ? 
C17 C18 1.388(3) . ? 
C17 H17 0.9300 . ? 
C18 H18 0.9300 . ? 
C19 C24 1.379(3) . ? 
C19 C20 1.389(3) . ? 
C20 C21 1.378(3) . ? 
C20 H20 0.9300 . ? 
C21 C22 1.370(3) . ? 
C21 H21 0.9300 . ? 
C22 C23 1.361(4) . ? 
C22 H22 0.9300 . ? 
C23 C24 1.382(3) . ? 
C23 H23 0.9300 . ? 
C24 H24 0.9300 . ? 
Co2 O4' 2.046(9) 2 ? 
Co2 O4' 2.046(9) . ? 
Co2 O1 2.071(2) . ? 
Co2 O1 2.071(2) 2 ? 
Co2 O5 2.15(2) . ? 
Co2 O5 2.15(2) 2 ? 
Co2 O4 2.274(18) 2 ? 
Co2 O4 2.274(18) . ? 
N1 O3 1.202(3) . ? 
N1 O2 1.232(3) . ? 
N1 O1 1.258(3) . ? 
N2 O6 1.202(12) . ? 
N2 O5 1.218(12) . ? 
N2 O4 1.239(12) . ? 
N2' O5' 1.207(7) . ? 
N2' O6' 1.210(7) . ? 
N2' O4' 1.258(7) . ? 
 
loop_ 
 _geom_angle_atom_site_label_1 
 _geom_angle_atom_site_label_2 
 _geom_angle_atom_site_label_3 
 _geom_angle 
 _geom_angle_site_symmetry_1 
 _geom_angle_site_symmetry_3 
 _geom_angle_publ_flag 
C1 As1 C13 108.10(8) . . ? 
C1 As1 C19 107.91(8) . . ? 
C13 As1 C19 111.57(8) . . ? 
C1 As1 C7 108.12(8) . . ? 
C13 As1 C7 111.42(8) . . ? 
C19 As1 C7 109.58(8) . . ? 
C6 C1 C2 120.97(18) . . ? 
C6 C1 As1 119.67(15) . . ? 
C2 C1 As1 119.37(14) . . ? 
C3 C2 C1 119.2(2) . . ? 
C3 C2 H2 120.4 . . ? 
C1 C2 H2 120.4 . . ? 
C4 C3 C2 119.7(2) . . ? 
C4 C3 H3 120.1 . . ? 
C2 C3 H3 120.1 . . ? 
C3 C4 C5 121.0(2) . . ? 
C3 C4 H4 119.5 . . ? 
C5 C4 H4 119.5 . . ? 
C4 C5 C6 120.5(2) . . ? 
C4 C5 H5 119.7 . . ? 
C6 C5 H5 119.7 . . ? 
C1 C6 C5 118.6(2) . . ? 
C1 C6 H6 120.7 . . ? 
C5 C6 H6 120.7 . . ? 
C12 C7 C8 119.68(18) . . ? 
C12 C7 As1 120.15(15) . . ? 
C8 C7 As1 120.12(14) . . ? 
C9 C8 C7 119.91(19) . . ? 
C9 C8 H8 120.0 . . ? 
C7 C8 H8 120.0 . . ? 
C10 C9 C8 120.7(2) . . ? 
C10 C9 H9 119.6 . . ? 
C8 C9 H9 119.6 . . ? 
C9 C10 C11 119.3(2) . . ? 
C9 C10 H10 120.4 . . ? 
C11 C10 H10 120.4 . . ? 
C12 C11 C10 120.6(2) . . ? 
C12 C11 H11 119.7 . . ? 
C10 C11 H11 119.7 . . ? 
C11 C12 C7 119.8(2) . . ? 
C11 C12 H12 120.1 . . ? 
C7 C12 H12 120.1 . . ? 
C14 C13 C18 120.81(19) . . ? 
C14 C13 As1 121.05(15) . . ? 
C18 C13 As1 117.86(16) . . ? 
C13 C14 C15 119.4(2) . . ? 
C13 C14 H14 120.3 . . ? 
C15 C14 H14 120.3 . . ? 
C16 C15 C14 119.5(2) . . ? 
C16 C15 H15 120.3 . . ? 
C14 C15 H15 120.3 . . ? 
C17 C16 C15 121.2(2) . . ? 
C17 C16 H16 119.4 . . ? 
C15 C16 H16 119.4 . . ? 
C16 C17 C18 120.4(2) . . ? 
C16 C17 H17 119.8 . . ? 
C18 C17 H17 119.8 . . ? 
C13 C18 C17 118.7(2) . . ? 
C13 C18 H18 120.7 . . ? 
C17 C18 H18 120.7 . . ? 
C24 C19 C20 120.1(2) . . ? 
C24 C19 As1 120.80(16) . . ? 
C20 C19 As1 118.93(15) . . ? 
C21 C20 C19 119.1(2) . . ? 
C21 C20 H20 120.4 . . ? 
C19 C20 H20 120.4 . . ? 
C22 C21 C20 120.5(2) . . ? 
C22 C21 H21 119.8 . . ? 
C20 C21 H21 119.8 . . ? 
C23 C22 C21 120.3(2) . . ? 
C23 C22 H22 119.8 . . ? 
C21 C22 H22 119.8 . . ? 
C22 C23 C24 120.5(2) . . ? 
C22 C23 H23 119.8 . . ? 
C24 C23 H23 119.8 . . ? 
C19 C24 C23 119.4(2) . . ? 
C19 C24 H24 120.3 . . ? 
C23 C24 H24 120.3 . . ? 
O4' Co2 O4' 91.8(4) 2 . ? 
O4' Co2 O1 120.5(3) 2 . ? 
O4' Co2 O1 116.6(3) . . ? 
O4' Co2 O1 116.6(3) 2 2 ? 
O4' Co2 O1 120.5(3) . 2 ? 
O1 Co2 O1 93.27(12) . 2 ? 
O4' Co2 O5 145.8(3) 2 . ? 
O4' Co2 O5 54.1(4) . . ? 
O1 Co2 O5 79.6(4) . . ? 
O1 Co2 O5 86.8(4) 2 . ? 
O4' Co2 O5 54.0(4) 2 2 ? 
O4' Co2 O5 145.8(3) . 2 ? 
O1 Co2 O5 86.8(4) . 2 ? 
O1 Co2 O5 79.6(4) 2 2 ? 
O5 Co2 O5 160.2(6) . 2 ? 
O4' Co2 O4 6.6(6) 2 2 ? 
O4' Co2 O4 90.41(18) . 2 ? 
O1 Co2 O4 115.7(4) . 2 ? 
O1 Co2 O4 122.6(3) 2 2 ? 
O5 Co2 O4 143.6(5) . 2 ? 
O5 Co2 O4 55.9(4) 2 2 ? 
O4' Co2 O4 90.41(18) 2 . ? 
O4' Co2 O4 6.6(6) . . ? 
O1 Co2 O4 122.6(3) . . ? 
O1 Co2 O4 115.7(4) 2 . ? 
O5 Co2 O4 55.9(4) . . ? 
O5 Co2 O4 143.6(5) 2 . ? 
O4 Co2 O4 89.8(6) 2 . ? 
O3 N1 O2 123.4(3) . . ? 
O3 N1 O1 121.5(3) . . ? 
O2 N1 O1 115.1(2) . . ? 
N1 O1 Co2 103.54(17) . . ? 
O6 N2 O5 122.9(13) . . ? 
O6 N2 O4 121.6(13) . . ? 
O5 N2 O4 115.5(12) . . ? 
N2 O4 Co2 90.9(11) . . ? 
N2 O5 Co2 97.5(11) . . ? 
O5' N2' O6' 124.3(6) . . ? 
O5' N2' O4' 117.9(7) . . ? 
O6' N2' O4' 117.8(7) . . ? 
N2' O4' Co2 111.5(6) . . ? 
 
_diffrn_measured_fraction_theta_max    0.995 
_diffrn_reflns_theta_full              28.26 
_diffrn_measured_fraction_theta_full   0.995 
_refine_diff_density_max    0.243 
_refine_diff_density_min   -0.418 
_refine_diff_density_rms    0.052 
